# Supplementary material for: The Expression of Trace Amine-Associated Receptors (TAARs) in Breast Cancer Is Coincident with the Expression of Neuroactive Ligand–Receptor Systems and Depends on Tumor Intrinsic Subtype
Source: MDPI journal article supplement (doi:10.3390/biom13091361), 2023-09-07
Supplement: s1 [file s1]

## Supplementary S1: Tables S1 and S2

**Table S1** Clinicopathological characteristics of breast cancer samples in datasets included in the analysis of associations between clinico-pathologic breast cancer characteristics and TAARs expression\*

| Dataset ID                           | GSE20685 | GSE2506 | GSE58215 | GSE80999 | GSE102484 | GSE119937 | GSE131769 |
|--------------------------------------|----------|---------|----------|----------|-----------|-----------|-----------|
| <b>Tumor's size and extent</b>       |          |         |          |          |           |           |           |
| T1                                   | 99       | 30      | ND       | ND       | 276       | 61        | ND        |
| T2                                   | 189      | 255     | ND       | ND       | 377       | 51        | ND        |
| T3                                   | 26       | 145     | ND       | ND       | 24        | 4         | ND        |
| T4                                   | 12       | 75      | ND       | ND       | 0         | 0         | ND        |
| <b>Lymph node involvement</b>        |          |         |          |          |           |           |           |
| N0                                   | 137      | 157     | ND       | ND       | 300       | 58        | ND        |
| N1                                   | 87       | 244     | ND       | ND       | 214       | 60        | ND        |
| N2                                   | 63       | 66      | ND       | ND       | 87        | 0         | ND        |
| N3                                   | 39       | 41      | ND       | ND       | 82        |           | ND        |
| <b>Distant metastases</b>            |          |         |          |          |           |           |           |
| M0                                   | 319      | 508     | ND       | ND       | 582       | ND        | ND        |
| M1                                   | 8        | 0       | ND       | ND       | 101       | ND        | ND        |
| <b>Disease stage</b>                 |          |         |          |          |           |           |           |
| Stage I                              | ND       | 8       | ND       | ND       | 175       | ND        | 77        |
| Stage II                             | ND       | 272     | ND       | ND       | 328       | ND        | 157       |
| Stage III                            | ND       | 224     | ND       | ND       | 174       | ND        | 62        |
| Stage IV                             | ND       | 0       | ND       | ND       | 0         | ND        | 0         |
| <b>Tumor differentiation (grade)</b> |          |         |          |          |           |           |           |
| G1                                   | ND       | 32      | 43       | 52       | ND        | 3         | ND        |
| G2                                   | ND       | 190     | 109      | 151      | ND        | 23        | ND        |
| G3                                   | ND       | 284     | 283      | 153      | ND        | 80        | ND        |

\* The data are represented in accordance with series data from the GEO database and may be lost for the part of samples in the study groups.

**Table S2** The levels and frequency of TAARs mRNA expression in breast cancer samples described in RNA-seq generated datasets included in the analysis (in CPM).

| Dataset ID            |               | GSE119937     | GSE184717  | GSE113890  | GSE113890 |
|-----------------------|---------------|---------------|------------|------------|-----------|
| Sample characteristic |               | Primary tumor | Metastases | Metastases | CTC       |
| TAAR1                 | min           | 0             | 0          | 0          | 0         |
|                       | max           | 33.37         | 7.97       | 2.97       | 3.28      |
|                       | mean          | 4.32          | 0.88       | 0.60       | 0.29      |
|                       | % of positive | 81.4          | 32.1       | 33.3       | 14.3      |
| TAAR2                 | min           | 0             | 0          | 0          | 0         |
|                       | max           | 28.45         | 20.60      | 5.43       | 38.77     |
|                       | mean          | 4.93          | 2.28       | 0.82       | 2.54      |
|                       | % of positive | 83.1          | 42.9       | 33.3       | 33.3      |
| TAAR5                 | min           | 0             | 0          | 0          | 0         |
|                       | max           | 39.18         | 17.27      | 9.90       | 111.51    |
|                       | mean          | 5.23          | 1.68       | 1.48       | 6.53      |
|                       | % of positive | 81.4          | 32.8       | 37.5       | 28.6      |
| TAAR6                 | min           | 0             | 0          | 0          | 0         |
|                       | max           | 242.12        | 9.30       | 4.94       | 11.54     |
|                       | mean          | 15.40         | 1.06       | 0.89       | 1.99      |
|                       | % of positive | 87.3          | 39.3       | 33.3       | 33.3      |
| TAAR8                 | min           | 0             | 0          | 0          | 0         |
|                       | max           | 67.02         | 14.61      | 6.59       | 8.34      |
|                       | mean          | 7.74          | 1.41       | 0.90       | 0.68      |
|                       | % of positive | 86.4          | 35.7       | 37.5       | 23.8      |
| TAAR9                 | min           | 0             | 0          | 0          | 0         |
|                       | max           | 79.98         | 12.51      | 3.76       | 2.31      |
|                       | mean          | 8.20          | 1.12       | 0.68       | 0.18      |
|                       | % of positive | 84.7          | 28.6       | 33.3       | 9.5       |
